1 Genetic interactions among ADAMTS metalloproteases and basement membrane

2 molecules in cell migration in *Caenorhabditis elegans*

3

4 Short title:

5 Interaction among ADAMTS proteases and basement membrane proteins

6

7 **Ayaka Imanishi, Yuma Aoki, Masaki Kakehi, Shunsuke Mori, Tomomi Takano,**

8 **Yukihiko Kubota, Hon-Song Kim, Yukimasa Shibata, Kiyoji Nishiwaki\***

9 Department of Bioscience, Kwansai Gakuin University, Sanda, Japan

10

- 11 \*To whom correspondence should be addressed:
- 12 Kiyoji Nishiwaki
- 13 Department of Bioscience, Kwansai Gakuin University
- 14 2-1 Gakuen, Sanda 669-1337, Japan
- 15 Phone: +81-79-565-7639
- 16 E-mail: [nishiwaki@kwansai.ac.jp](mailto:nishiwaki@kwansai.ac.jp)

18 **Abstract**

19 During development of the *Caenorhabditis elegans* gonad, the gonadal leader cells,  
20 called distal tip cells (DTCs), migrate in a U-shaped pattern to form the U-shaped gonad  
21 arms. The ADAMTS (a disintegrin and metalloprotease with thrombospondin motifs)  
22 family metalloproteases MIG-17 and GON-1 are required for correct DTC migration.  
23 Mutations in *mig-17* result in misshapen gonads due to the misdirected DTC migration,  
24 and mutations in *gon-1* result in shortened and swollen gonads due to the premature  
25 termination of DTC migration. Although the phenotypes shown by *mig-17* and *gon-1*  
26 mutants are very different from one another, mutations that result in amino acid  
27 substitutions in the same basement membrane protein genes, *emb-9/collagen IV a1*, *let-*  
28 *2/collagen IV a2* and *fbl-1/fibulin-1*, were identified as genetic suppressors of *mig-17*  
29 and *gon-1* mutants. To understand the roles shared by these two proteases, we examined  
30 the effects of the *mig-17* suppressors on *gon-1* and the effects of the *gon-1* suppressors  
31 and enhancers on *mig-17* gonadal defects. Some of the *emb-9*, *let-2* and *fbl-1* mutations  
32 suppressed both *mig-17* and *gon-1*, whereas others acted only on *mig-17* or *gon-1*.  
33 These results suggest that *mig-17* and *gon-1* have their specific functions as well as  
34 functions commonly shared between them for gonad formation. The levels of collagen  
35 IV accumulation in the DTC basement membrane were significantly higher in the *gon-1*

36 mutants as compared with wild type and were reduced to the wild-type levels when  
37 combined with suppressor mutations, but not with enhancer mutations, suggesting that  
38 the ability to reduce collagen IV levels is important for *gon-1* suppression.

39

## 40 **Introduction**

41 Members of the ADAMTS family of secreted zinc metalloproteases have important  
42 roles in animal development. Most of these proteases degrade extracellular matrix  
43 components such as proteoglycans or collagens [1]. Nineteen ADAMTS genes have  
44 been identified in the human genome, and mutations in many of them result in  
45 hereditary diseases that are related to disorders of the extracellular matrix [2, 3].  
46 Multiple ADAMTS proteases often function in a common developmental process. For  
47 example, the functions of ADAMTS-5, -9 and -20 are required for interdigital web  
48 regression [4]. ADAMTS-9 and -20 are needed for closure of the palate and for  
49 craniofacial morphogenesis and neural tube closure through their function in  
50 ciliogenesis [4, 5]. ADAMTS-5 and -15 act in myoblast fusion [6]. These enzymes  
51 appear to function in a partially overlapping manner. However, the roles shared by these  
52 ADAMTS proteases in development still remain elusive.

53       Among five ADAMTS genes in *C. elegans*, *gon-1* and *mig-17* play essential roles

54 in the development of the somatic gonad [7, 8]. Both GON-1 and MIG-17 localize to  
55 the gonadal basement membrane (BM) [9, 10]. In the *mig-17* mutants, DTCs meander  
56 and stray, resulting in an abnormal gonadal shape. In contrast, in the *gon-1* mutants,  
57 DTCs rarely migrate and the gonads remain small. We have isolated and analyzed the  
58 genetic suppressors for DTC migration defects in *mig-17* mutants. Dominant gain-of-  
59 function mutations in the *fbl-1/fibulin-1* and *let-2/collagen IV  $\alpha$ 2* chain, which encode  
60 BM molecules, have been frequently isolated as suppressors [11, 12]. The *fbl-1(gf)*  
61 mutations are amino acid substitutions in the second epidermal growth factor-like motif  
62 of FBL-1C, one of the two splicing isoforms, and FBL-1C protein is secreted by the  
63 intestine to be released into the gonadal BM in a MIG-17 activity-dependent manner  
64 [11]. Suppression of *mig-17* by *fbl-1(gf)* mutations is dependent on the BM molecule  
65 NID-1/nidogen [12]. *let-2(gf)* mutations are associated with amino acid changes within  
66 the triple helix domain or the C-terminal non-collagenous domain (NC)1 of collagen IV.  
67 LET-2 protein is secreted from body wall muscle cells and DTCs and localized to the  
68 gonadal BM in a MIG-17 activity-independent manner. Unlike the case of *fbl-1(gf)*,  
69 suppression of *mig-17* by *let-2(gf)* mutations does not require NID-1 [12].

70 Genetic suppressor analysis of *gon-1* mutants revealed that loss-of-function  
71 (deletion) mutations in *fbl-1* can suppress the shortened-gonad phenotype of *gon-1*

72 mutants. Because *fbl-1* deletion mutants also exhibit the shortened-gonad phenotype,  
73 GON-1 and FBL-1 act antagonistically to regulate gonad formation [13]. This genetic  
74 interaction is mediated by the control of collagen IV accumulation in the gonadal BM:  
75 GON-1 acts to reduce collagen IV levels, whereas FBL-1 acts to maintain collagen IV  
76 levels [14].

77       Although *mig-17* and *gon-1* mutants are phenotypically very different, they are  
78 both suppressed or enhanced by mutations in *let-2* and *fbl-1*. In this study, we isolated  
79 novel suppressor mutations in *emb-9* for *mig-17* and in *let-2* for *gon-1* gonadal defects.  
80 Together with the previously isolated suppressors and enhancers, we investigated the  
81 consequences when suppressors for *mig-17* were combined with *gon-1* mutations, and  
82 when *gon-1* suppressors and enhancers were combined with *mig-17* mutations. We  
83 found that some of the *emb-9*, *let-2* and *fbl-1* mutations suppressed both *mig-17* and  
84 *gon-1*, whereas others suppressed only *mig-17* or *gon-1*. These results suggest that *mig-*  
85 *17* and *gon-1* have their specific functions as well as the functions commonly shared  
86 between them for gonad formation.

87

## 88 **Materials and Methods**

### 89 **Strains and genetic analysis**

90 Culture, handling and ethyl methanesulfonate (EMS) mutagenesis of *C. elegans* were  
91 conducted as described [15]. The following mutations and transgenes were used in this  
92 work: *mig-17(k174)*, *gon-1(e1254, g518)*, *fbl-1(k201, tk45)*, *let-2(g25, b246, k193,*  
93 *k196)*, *emb-9(tk75, g34, g23cg46)* and *tkTi1[emb-9::mCherry]* [7, 8, 11, 12, 14, 16-18].  
94 The suppressor mutations were genetically mapped with single-nucleotide  
95 polymorphism mapping using *mig-17(k174)* and *gon-1(e1254)* mutant strains, which are  
96 in the CB4856 background [19]. Among the 11 *mig-17(k174)* suppressors, *k204* and  
97 *k207* were mapped to the center of linkage group (LG) III. Next-generation sequence  
98 analysis identified missense mutations in *emb-9* in these suppressors. Of the two *gon-*  
99 *1(e1254)* suppressors, one was mapped to the right end of LG X and was identified by  
100 next-generation sequence analysis as corresponding to a missense mutation in *let-2*. All  
101 experiments were conducted at 20°C. The temperature-sensitive mutants *emb-9(g34)*  
102 and *let-2(g25, b246)*, which arrest during embryogenesis or early larval stages at 25°C,  
103 do proliferate at 20°C. Because *gon-1(e1254, g518)* and *fbl-1(tk45)* mutants were  
104 sterile, we used the genetic balancer *nT1[qIs51] (IV;V)* to maintain these mutants and to  
105 generate double mutants containing these mutations.

106

107 **Microscopy**

108 Gonad migration phenotypes were scored using a Nomarski microscope (Axioplan 2;  
109 Zeiss). Analysis of gonadal phenotypes was performed at the young-adult stage as  
110 described [20]. Although the gonadal phenotypes of some strains used are published,  
111 we reevaluated them in this study. The levels of EMB-9-mCherry were quantified as  
112 follows. For each sample, confocal images of a sagittal section of the DTCs were  
113 obtained with a Zeiss Imager M2 microscope equipped with a spinning-disk confocal  
114 scan head (CSU-X1; Yokogawa) and an ImageEM CCD camera (ImageEM;  
115 Hamamatsu Photonics). Using ImageJ software, we measured the fluorescence  
116 intensities along three drawn lines, each of which crossed the DTC BM; the average  
117 background intensities inside the gonad were subtracted from the peak values of the  
118 line scan, and the resulting corrected values were averaged.

119

## 120 **Transgenic analysis of suppressors**

121 Germline transformation was carried out as described [21]. Plasmids containing *emb-*  
122 *9(k204)*, *emb-9(k207)* and *let-2(tk101)* were constructed by introducing these  
123 mutations individually into their respective wild-type constructs [12, 14]. These  
124 plasmids were injected into the *unc-119(e2498)* gonad at 1–2 ng/μl with 10 ng/μl *unc-*  
125 *119+* plasmid [22], 70 ng/μl *sur-5::gfp* plasmid [23] and 70 ng/μl pBSIIKS(–), and



126 the resulting extrachromosomal arrays were transferred to either *mig-17(k174); unc-*  
127 *119(e2498)* or *gon-1(e1254); unc-119(e2498)* animals by mating.

128

## 129 **Homology modeling of NC1 domains**

130 Homology modeling was conducted based on the crystal structures of bovine collagen  
131 IV NC1 domains [24] using the SWISS-MODEL server. Ribbon diagrams were  
132 created and edited with the Swiss-Pdb Viewer software.

133

## 134 **Results**

### 135 **Isolation of novel suppressors of *mig-17* and *gon-1* mutants**

136 The *C. elegans* hermaphrodite gonad arms extend to the anterior-right and posterior-left  
137 areas of the body cavity. The U shape of the gonad arms are generated by migration of  
138 the gonadal leader cells, the DTCs, over the body wall during larval development (S1  
139 Fig). *gon-1* mutants exhibit shortened gonads due to the premature termination of DTC  
140 migration and are sterile. In contrast, *mig-17* mutants show misshapen gonad arms due  
141 to the misdirected migration of DTCs, but they are still fertile. Although both of these  
142 genes encode ADAMTS family metalloproteases, the phenotypes shown by these  
143 mutants are very different.

144 The null allele *gon-1(q518)* exhibits a fully penetrant short gonad phenotype that  
145 cannot be distinguished from that of the *mig-17(k174); gon-1(q518)* double null mutants  
146 [8]. The phenotypic penetrance of *gon-1(e1254)*, a partial loss-of-function allele that  
147 results in a milder gonad phenotype as compared with *gon-1(q518)*, was enhanced in  
148 combination with the *mig-17(k174)* null allele (Fig 1A; S2 Fig), indicating that *gon-1*  
149 and *mig-17* function in partially overlapping pathways.

150

151 **Fig 1. DTC migration phenotypes of *mig-17*, *gon-1* and the suppressors. A.**

152 Percentage of DTC migration defects in *mig-17(k174)* and *gon-1(e1254)* single mutants  
153 and their double mutants. **B.** Percentage of DTC migration defects in *mig-17(k174)*  
154 animals with the *emb-9(k204)* or *emb-9(k207)* mutation or with extrachromosomal  
155 arrays carrying these mutant genes. **C.** Percentage of DTC migration defects in *gon-*  
156 *1(e1254)* or *gon-1(q518)* animals with a *let-2(tk101)* mutation or with an  
157 extrachromosomal array carrying the *let-2(tk101)* mutant gene.

158

159 To identify genes interacting with *mig-17* and *gon-1*, we isolated novel  
160 suppressor mutations for DTC migration defects of *mig-17* and *gon-1* mutants using  
161 EMS mutagenesis. We isolated 11 suppressor mutants of *mig-17(k174)*, a null allele that

162 has a nonsense mutation in the pro-domain (S2 Fig). Two of these mutants, *k204* and  
163 *k207*, were genetically mapped near the center of LG III and acted as dominant  
164 suppressors for *mig-17* (Fig 1B). Next-generation sequence analysis of *k204* and *k207*  
165 identified mutations in *emb-9*, which encodes the  $\alpha 1$  subunit of collagen IV. Both  
166 mutations were amino acid substitutions in the C-terminal NC domain. We generated  
167 plasmids carrying these mutant alleles of *emb-9* and introduced them into *mig-17*  
168 mutants. The extrachromosomal arrays containing these plasmids partially rescued the  
169 gonadal phenotype of *mig-17* mutants (Fig 1B), indicating that *emb-9(k204)* and *emb-*  
170 *9(k207)* mutations are causative for *mig-17* suppression.

171 We used EMS mutagenesis to isolate suppressors of *gon-1(e1254)*, a strong loss-  
172 of-function allele with a nonsense mutation in the C-terminal domain, which contains  
173 thrombospondin type 1 motifs (S2 Fig). Although *gon-1(e1254)* homozygotes are  
174 sterile, the transgenic strain *gon-1(e1254); tkEx370[gon-1 fosmid, rol-6(su1006), sur-*  
175 *5::GFP]*, which carries an extrachromosomal array that consists of multiple copies of  
176 the wild-type *gon-1* fosmid (WRM0622dB04), mutant *rol-6(1006)* plasmid and *sur-*  
177 *5::GFP* plasmid, does proliferate as a homozygote. *rol-6(su1006)* and *sur-5::GFP* are  
178 marker plasmids that result in the roller movement phenotype and GFP expression in all  
179 somatic nuclei, respectively. We isolated non-roller and GFP<sup>-</sup> fertile animals from the

180 F<sub>2</sub> or F<sub>3</sub> generation of transgenic animals treated with EMS (S3 Fig). One of the two  
181 *gon-1* suppressors, *tk101*, acted as a dominant suppressor of *gon-1(e1254)* and was  
182 genetically mapped to the right end of LG X. *tk101* was a recessive suppressor for the  
183 *gon-1(q518)* null allele (Fig 1C). Next-generation sequence analysis revealed an amino  
184 acid substitution in the N-terminal region of the triple helical domain of *let-2*, which  
185 encodes the  $\alpha 2$  subunit of collagen IV. The extrachromosomal array containing this *let-*  
186 *2* mutant plasmid partially rescued the gonadal phenotype of *gon-1(e1254)* (Fig 1C),  
187 indicating that *let-2(tk101)* is the causative mutation for *gon-1* suppression.

188

### 189 **Swapping experiments for *mig-17* and *gon-1* suppressors or enhancers**

190 Thus far, our genetic screening had identified various mutant alleles in *let-2* and *fbl-1*  
191 that act as suppressors of *mig-17* [11, 12] and in *fbl-1* that act as a suppressor of *gon-1*  
192 [14], among which the suppressor mutant alleles differed between *mig-17* and *gon-1*.  
193 We also previously showed that loss-of-function mutations *emb-9(g34)* and *g23cg46*  
194 and *let-2(g25)* and *b246* act as suppressors of *mig-17* [12] and that *emb-9(tk75)*, which  
195 was originally isolated as a suppressor of *fbl-1(tk45)*, acts as an enhancer of *gon-1* [14].  
196 *emb-9(g34)* and *g23cg46* also enhance *gon-1* [14]. In this study, we identified novel  
197 suppressors *let-2(tk101)* for *gon-1* and *emb-9(k204)* and *k207* for *mig-17* (Fig 2). These

198 results imply that MIG-17 and GON-1 ADAMTS proteases functionally interact with  
199 the same BM proteins collagen IV  $\alpha 1$  and  $\alpha 2$  subunits and fibulin-1.

200

201 **Fig 2. Suppressor and enhancer mutations for *gon-1* and *mig-17*, and summary for**

202 **swapping experiments of suppressors and enhancers. A. *fbl-1*, *emb-9* and *let-2***

203 alleles that suppress or enhance the gonadal defects of *gon-1(e1254)* or *mig-17(k174)*.

204 **B.** Locations of mutations in FBL-1C, EMB-9A and LET-2A proteins. The mutation

205 sites are shown by arrowheads (amino acid substitutions) or bidirectional arrows

206 (deletions). Both *fbl-1(tk45)* and *emb-9(g23cg46)* deletions are potential null alleles, as

207 they are expected to introduce termination codons shortly after the deleted region [11,

208 17]. **C.** Summary of effects of *fbl-1*, *emb-9* and *let-2* alleles on *mig-17(k174)* and *gon-*

209 *1(e1254)* mutants. S and E represent suppression and enhancement, respectively.

210

211 To understand the roles shared by these two proteases, we examined how the

212 suppressors of *mig-17* affect *gon-1* and how the suppressors and enhancers of *gon-1*

213 affect *mig-17* gonadal defects. We examined all the combinations of double mutants.

214 The representative phenotypes exhibited by these double mutants are shown in Fig 3,

215 and their phenotypic penetrance scored at the young adult stage is shown in Fig 4 and

216 Fig 5. In *mig-17(k174)* animals and in double mutants containing *mig-17(k174)*,  
217 suppression was assessed by whether the U-shaped gonad was formed as in the wild  
218 type. In *gon-1(e1254)* animals and in the double mutants containing *gon-1(e1254)*,  
219 suppression was assessed by whether the gonad arms reached the dorsal muscle.

220

221 **Fig 3. Representative Nomarski images of young adult hermaphrodite gonads of**  
222 **wild-type, *gon-1(e1254)*, *mig-17(k174)* and double-mutant animals analyzed in this**  
223 **study.** The gonad morphology is shown by dashed arrows. Anterior is to the left, dorsal  
224 up. Arrowheads point to the vulva. Bar: 20  $\mu$ m.

225

226 **Fig 4. Percentage of DTC migration defects in *mig-17(k174)* mutants in the**  
227 **presence of *fbl-1*, *emb-9* and *let-2* alleles.**  $n = 60$  for each experiment.  $P$ -values from  
228 Fisher's exact test comparing the double mutants with *mig-17(k174)* animals:  $**P <$   
229  $0.01$ ;  $*P < 0.05$ ; NS, not significant.

230

231 **Fig 5. Percentage of gonad arms that failed to reach the dorsal muscle of *gon-***  
232 ***1(e1254)* mutants in the presence of *fbl-1*, *emb-9* and *let-2* alleles.**  $n = 60$  for each  
233 experiment.  $P$ -values from Fisher's exact test comparing the double mutants with *gon-*

234 *l(e1254)* animals: \*\* $P < 0.01$ ; \* $P < 0.05$ ; NS, not significant.

235

236 For the *fbl-1* alleles, the *k201* mutation suppressed both *mig-17* and *gon-1*.

237 Although *tk45* suppressed *gon-1*, it rather enhanced *mig-17*. For the *emb-9* alleles,

238 although *g34* and *g23cg46/+* suppressed *mig-17*, they both enhanced *gon-1*. *k204* and

239 *k207* suppressed *mig-17* strongly, whereas they suppressed *gon-1* somewhat weakly.

240 *tk75* acted as a strong enhancer for both *mig-17* and *gon-1*. For the *let-2* alleles,

241 although *g25* and *b246* suppressed *mig-17*, they both enhanced *gon-1*. *tk101*, *k196* and

242 *k193* suppressed both *mig-17* and *gon-1*. These data are summarized in Fig 2C. Because

243 *gon-1* mutants are 100% sterile, we also analyzed fertility in the double mutants (S4

244 Fig). We found that among *fbl-1*, *emb-9* and *let-2*, some alleles suppressed or enhanced

245 both *mig-17* and *gon-1*, whereas others affected *mig-17* and *gon-1* differentially. In the

246 latter case, the alleles that suppressed *mig-17* or *gon-1* rather enhanced *gon-1* or *mig-17*,

247 respectively. These results suggested that the former suppressor alleles suppress the

248 common functional defects in *mig-17* and *gon-1*, whereas the latter alleles suppress

249 gene-specific defects in either *mig-17* or *gon-1*.

250 Three mutations found in EMB-9 (*k204*, *k207* and *tk75*) and one in LET-2 (*k193*)

251 were localized to the C-terminal NC1 domain of these collagen IV molecules. Using

252 SWISS-MODEL, we deduced the three-dimensional structures of the NC1 domains of  
253 EMB-9 and LET-2 based on the crystal structures of bovine collagen IV NC1 domains  
254 [24] (Fig 6). We found that three amino acid substitutions in EMB-9, which are  
255 separated from one another in the primary sequence, were closely apposed in the three-  
256 dimensional structure. In the type IV collagen meshwork, triple-helical collagen  
257 molecules connect to one another through NC1-NC1 domain interactions. EMB-9(*k207*  
258 and *tk75*) mutations were localized to the NC1-NC1 interface regions, and EMB-  
259 9(*k204*) was close to these interface regions, suggesting that these amino acid  
260 substitutions may affect physical interactions between two NC1 trimers. However,  
261 because these mutants were able to proliferate as homozygotes, their mutant collagen  
262 molecules were most likely successfully assembled into the functional network in the  
263 BM. It is interesting that the amino acid substitutions EMB-9(*k204* and *k207*), which  
264 strongly suppressed *gon-1* and *mig-17*, and EMB-9(*tk75*), which strongly enhanced  
265 *gon-1* and *mig-17*, were closely localized in the three-dimensional structure.

266

267 **Fig 6. Predicted three-dimensional structures of NC1 domains of *C. elegans* type**  
268 **IV collagen subunits EMB-9 and LET-2.** The segments corresponding to the interface  
269 region of two NC1 trimers are shown in magenta. The mutated amino acids in the *k204*,



270 *k207*, *tk75* and *k193* mutations are highlighted each one in a different color.

271

## 272 **Collagen IV accumulation in the DTC BM**

273 Based on an immunohistochemical analysis, we previously reported that the reduced  
274 accumulation of collagen IV in the gonadal BM in animals with *fbl-1(tk45)*, a null  
275 mutation, can be compensated by *gon-1(e1254)* [14]. To examine the amount of  
276 collagen IV accumulation in the BM quantitatively, we used a functional *emb-*  
277 *9::mCherry* fusion reporter [18]. Third larval stage animals in which their DTCs were at  
278 or shortly beyond the first turn were selected, and the fluorescence intensity of the BM  
279 surrounding the DTCs was measured (Fig 7A-C). Among the six single mutants  
280 examined, we observed that the intensity was slightly higher in *fb-1(tk45)*, significantly  
281 lower in *let-2(k196)* and significantly higher in *gon-1(e1254)* as compared with wild  
282 type. When combined with *fbl-1(k201* and *tk45)* or *let-2(k196* and *g25)* mutations, the  
283 level of EMB-9-mCherry accumulation in *mig-17* mutants was not affected except for  
284 the case of *let-2(k196)*, in which a slightly lower accumulation was observed (Fig 7B).  
285 Because the three mutations *fbl-1(k201)*, *let-2(k196)* and *let-2(g25)* suppressed *mig-17*  
286 but *fbl-1(tk45)* did not, the levels of EMB-9-mCherry accumulation were not correlated  
287 with *mig-17* suppression. We then combined *fbl-1(k201* and *tk45)* or *let-2(k196* and

288 *g25*) mutations with *gon-1*. We observed that the levels of EMB-9-mCherry  
289 accumulation in *fbl-1(k201)*, *fbl-1(tk45)* and *let-2(k196)*, all of which suppress *gon-1*,  
290 were significantly lower than that of the *gon-1* single mutants, whereas the level was not  
291 affected in *let-2(g25)*, which enhances *gon-1* (Fig 7C). Thus, it is possible that the  
292 reduction in EMB-9-mCherry accumulation is indicative of *gon-1* suppression.

293

294 **Fig 7. Accumulation of emb-9-mCherry in the BM. A.** Representative images of  
295 optical sections of the gonadal tip shortly after the first turn of the DTCs in wild-type,  
296 *mig-17(k174)* and *gon-1(e1254)* animals expressing EMB-9-mCherry. Arrowheads  
297 point to DTCs. The right panel illustrates the gonadal BM (brown). The fluorescence  
298 intensity of the DTC BM was quantified by averaging the peak values along three lines  
299 (green) that cross the DTC BM (see Materials and methods). **B., C.** Box-and-whisker  
300 plot of the fluorescence intensity of EMB-9-mCherry in the DTC BM in animals with  
301 wild-type and mutant *fbl-1* and *let-2* alleles and with those mutant alleles in  
302 combination with *mig-17(k174)* (B) or *gon-1(e1254)* (C);  $n = 20$ . Boxplots indicate the  
303 median and the interquartile range. Whiskers extend to the minimum and maximum  
304 values within 1.5 times the interquartile range. Points indicate outliers. *P*-values from  
305 Student's t-test are indicated:  $**P < 0.01$ ;  $*P < 0.05$ ; NS, not significant.

306

## 307 **Discussion**

308 In the present study, we isolated novel suppressor mutations of gonadal defects related  
309 to *mig-17* and *gon-1* mutants. We identified alleles of *emb-9* as *mig-17* suppressors and  
310 an allele of *let-2* as a *gon-1* suppressor for the first time. We found that some of the  
311 *emb-9* (*collagen IV a1*), *let-2* (*collagen IV a2*) and *fbl-1* (*fibulin-1*) mutations  
312 suppressed both *gon-1* and *mig-17*, whereas others suppressed only *gon-1* or *mig-17*.  
313 These results suggest that *gon-1* and *mig-17* have their specific functions as well as  
314 functions in common that relate to gonad formation. Probably, the loss of the gene-  
315 specific functions is the cause of the very different phenotypes of the *gon-1* and *mig-17*  
316 mutants.

317 The *fbl-1(tk45)* null mutation suppressed *gon-1* but enhanced *mig-17*. The *gon-1*  
318 suppression is likely to be due to the reduction of collagen levels in the late larval stages  
319 that results from loss of *fbl-1* activity [14], although the collagen levels were not  
320 reduced in the mid-L3 stage when the DTCs make their first turn (Fig 7C). FBL-1C acts  
321 downstream of MIG-17 to recruit NID-1/nidogen-1 to regulate directed DTC migration  
322 [12]. Thus, *mig-17* is enhanced probably because of the reduction of NID-1 in the DTC  
323 BM. In *mig-17* mutants, the DTCs do not migrate along their normal U-shaped route

324 because they often detach from the body wall (their normal migratory substratum) and  
325 mis-attach to the intestine [8]. Therefore, NID-1 is likely to be required for appropriate  
326 adhesiveness between the DTC and body wall BMs. The *fbl-1(k201)* gain-of-function  
327 mutation suppressed both *mig-17* and *gon-1*. *fbl-1(k201)* suppressed the collagen  
328 accumulation in *gon-1*, as did *fbl-1(tk45)*, but *fbl-1(k201)* is fully fertile on its own,  
329 unlike *fbl-1(tk45)* (S3 Fig). Therefore, it is possible that the *fbl-1(k201)* mutation may  
330 partially compromise the ability of FBL-1C to maintain collagen IV without affecting  
331 its ability to recruit NID-1.

332         The gain-of-function mutations of collagen IV *emb-9(k204, k207)* and *let-*  
333 *2(tk101, k196 and k193)* were potent suppressors of *mig-17* and *gon-1*. We found that  
334 the BM collagen levels in *let-2(k196)* were significantly decreased and that *let-2(k196)*  
335 suppressed the dramatic increase in collagen accumulation in *gon-1* animals. Although  
336 we did not examine the other gain-of-function collagen mutations, it is possible that the  
337 levels of BM collagen are similarly affected. In contrast, the gain-of-function mutation  
338 *emb-9(tk75)* enhanced both *mig-17* and *gon-1*. We previously showed that the levels of  
339 BM collagen in animals expressing the mutant EMB-9(*tk75*)  $\alpha$ 1 subunit can be  
340 maintained in the absence of FBL-1, which is otherwise required for the maintenance of  
341 BM collagen levels [14]. Therefore, it is likely that too much accumulation of collagen

342 in the BM could be causative for both the *mig-17* and *gon-1* mutant phenotypes.  
343 Although we could not detect over-accumulation of collagen in the *mig-17* mutant, this  
344 could be because of the insufficient sensitivity of our assay condition.

345 This model is not, however, consistent with the fact that the loss-of-function  
346 mutations of collagen IV, *emb-9(g34* and *g23cg46/+)* and *let-2(g25* and *b246)*, which  
347 conceivably reduce the levels of BM collagen, all acted as enhancers of *gon-1* even  
348 though they acted as suppressors of *mig-17*. The loss-of-function *emb-9(xd51)* mutation  
349 also enhances *gon-1* in the presynaptic bouton overgrowth phenotype [25]. In contrast,  
350 *emb-9(g34)* and *emb-9(b189)* can suppress the synaptic defect of *gon-1* when *emb-9*;  
351 *gon-1* double mutants are shifted up from 16 to 25°C after completion of embryogenesis  
352 [26]. In this case, it is possible that collagen IV containing the temperature-sensitive  
353 mutant proteins EMB-9(*g34*) and EMB-9(*b189*) form intracellular aggregates and thus  
354 are not secreted [16], and therefore the BM accumulation of collagen could be  
355 considerably decreased. Our analysis using the EMB-9-mCherry reporter revealed that  
356 the collagen levels of *let-2(g25); gon-1* or *let-2(g25); mig-17* double mutants were not  
357 lowered relative to the respective *gon-1* or *mig-17* single mutant (Fig 7B, C). It might be  
358 possible that a subtle reduction in collagen accumulation is sufficient for amelioration  
359 of BM physiology in *mig-17* mutants but instead worsens that in *gon-1* mutants. The

360 slight collagen reduction may promote NID-1 accumulation in the BM and suppress the  
361 *mig-17* gonadal defect.

362 Why is *gon-1* enhanced by collagen IV loss-of-function mutations? This  
363 seemingly contradictory phenomenon may be related to the dual function of GON-1. In  
364 addition to its predicted extracellular protease activity, GON-1 functions in the  
365 endoplasmic reticulum to transport secreted or membrane proteins from the  
366 endoplasmic reticulum to the Golgi. This transport activity is dependent on the C-  
367 terminal GON domain but is independent of protease activity [27]. For example, cell  
368 surface expression of the integrin receptors that are required for cell migration may be  
369 reduced and, therefore, the DTC migration activity in *gon-1* mutants may be weakened.  
370 Because the remodeling of the BM is coupled with epithelial cell migration [28, 29],  
371 reduced migration of DTCs could also lead to downregulation of BM remodeling,  
372 resulting in thick accumulation of collagen, which can further block DTC migration.  
373 Remodeling of the BM is likely to be mediated by the GON-1 protease activity.

374 We previously showed that a reduction in collagen IV lowers PAT-3/ $\beta$ -integrin  
375 expression in DTCs [14]. At the early second larval stage, the fluorescence levels of  
376 EMB-9-mCherry in *gon-1* mutants were closer to those in the wild type (K.N.,  
377 unpublished). Thus, it might be possible that when combined with loss-of-function

378 collagen IV mutants, the reduced collagen levels may further impair integrin expression  
379 in DTCs of *gon-1* animals in the second larval or younger stages. This might be the  
380 reason for the enhancement of the *gon-1* phenotype in the presence of collagen IV loss-  
381 of-function mutations.

382         It is unclear why the gain-of-function collagen IV mutation *let-2(k196)* did not  
383 enhance *gon-1*, as did *let-2(g25)*, even though *let-2(k196)* also reduced collagen  
384 accumulation. We speculate that GON-1 is the major enzyme responsible for turnover  
385 of BM collagen IV and that the mutant LET(*k196*) protein may confer the property by  
386 which the collagen IV meshwork is turned over quickly as compared with the wild-type  
387 meshwork even with the weakened activity of GON-1(*e1254*) mutant enzyme. If this is  
388 the case, the collagen meshwork containing EMB-9(*tk75*) may have gained a slower  
389 turnover rate.

390         Our observations suggest that both MIG-17 and GON-1 function to reduce  
391 collagen IV in the BM. Although this is consistent with the idea that collagen IV is the  
392 direct substrate of these enzymes, we still do not have evidence of this interaction.  
393 Future biochemical analysis is thus needed to determine the substrates. In addition,  
394 molecular structural analysis of interactions among these ADAMTS proteases and the  
395 BM molecules should shed light on the detailed mechanism of BM remodeling during

396 organogenesis.

397

## 398 **Acknowledgments**

399 We thank Noriko Nakagawa and Nami Okahashi for technical assistance. Some  
400 nematode strains used in this work were provided by the Caenorhabditis Genetics  
401 Center, which is funded by the National Institutes of Health National Center for  
402 Research Resources. This work was supported by a Grant-in-Aid for Scientific  
403 Research on Innovative Areas by Ministry of Education, Culture, Sports, Science and  
404 Technology to KN (22111005) and by the Naito Grant for the advancement of natural  
405 science to KN.

406

## 407 **References**

- 408 1. Apte SS. A disintegrin-like and metalloprotease (reprolysin-type) with  
409 thrombospondin type 1 motif (ADAMTS) superfamily: functions and mechanisms. *J Biol*  
410 *Chem.* 2009;284(46):31493-7. doi: 10.1074/jbc.R109.052340. PubMed PMID: 19734141;  
411 PubMed Central PMCID: PMCPMC2797218.
- 412 2. Mead TJ, Apte SS. ADAMTS proteins in human disorders. *Matrix Biol.* 2018;71-  
413 72:225-39. doi: 10.1016/j.matbio.2018.06.002. PubMed PMID: 29885460; PubMed Central  
414 PMCID: PMCPMC6146047.
- 415 3. Kelwick R, Desanlis I, Wheeler GN, Edwards DR. The ADAMTS (A Disintegrin  
416 and Metalloproteinase with Thrombospondin motifs) family. *Genome Biol.* 2015;16:113. doi:  
417 10.1186/s13059-015-0676-3. PubMed PMID: 26025392; PubMed Central PMCID:  
418 PMCPMC4448532.
- 419 4. McCulloch DR, Nelson CM, Dixon LJ, Silver DL, Wylie JD, Lindner V, et al.



- 420 ADAMTS metalloproteases generate active versican fragments that regulate interdigital  
421 web regression. *Dev Cell*. 2009;17(5):687-98. doi: 10.1016/j.devcel.2009.09.008. PubMed  
422 PMID: 19922873; PubMed Central PMCID: PMCPMC2780442.
- 423 5. Nandadasa S, Kraft CM, Wang LW, O'Donnell A, Patel R, Gee HY, et al. Secreted  
424 metalloproteases ADAMTS9 and ADAMTS20 have a non-canonical role in ciliary vesicle  
425 growth during ciliogenesis. *Nat Commun*. 2019;10(1):953. doi: 10.1038/s41467-019-08520-7.  
426 PubMed PMID: 30814516; PubMed Central PMCID: PMCPMC6393521.
- 427 6. Stupka N, Kintakas C, White JD, Fraser FW, Hanciu M, Aramaki-Hattori N, et al.  
428 Versican processing by a disintegrin-like and metalloproteinase domain with  
429 thrombospondin-1 repeats proteinases-5 and -15 facilitates myoblast fusion. *J Biol Chem*.  
430 2013;288(3):1907-17. doi: 10.1074/jbc.M112.429647. PubMed PMID: 23233679; PubMed  
431 Central PMCID: PMCPMC3548499.
- 432 7. Blelloch R, Kimble J. Control of organ shape by a secreted metalloprotease in the  
433 nematode *Caenorhabditis elegans*. *Nature*. 1999;399(6736):586-90. doi: 10.1038/21196.  
434 PubMed PMID: 10376599.
- 435 8. Nishiwaki K, Hisamoto N, Matsumoto K. A metalloprotease disintegrin that  
436 controls cell migration in *Caenorhabditis elegans*. *Science*. 2000;288(5474):2205-8. doi:  
437 10.1126/science.288.5474.2205. PubMed PMID: 10864868.
- 438 9. Ihara S, Nishiwaki K. Prodomain-dependent tissue targeting of an ADAMTS  
439 protease controls cell migration in *Caenorhabditis elegans*. *EMBO J*. 2007;26(11):2607-20.  
440 doi: 10.1038/sj.emboj.7601718. PubMed PMID: 17491590; PubMed Central PMCID:  
441 PMCPMC1888677.
- 442 10. Keeley DP, Hastie E, Jayadev R, Kelley LC, Chi Q, Payne SG, et al.  
443 Comprehensive Endogenous Tagging of Basement Membrane Components Reveals  
444 Dynamic Movement within the Matrix Scaffolding. *Dev Cell*. 2020;54(1):60-74 e7. doi:  
445 10.1016/j.devcel.2020.05.022. PubMed PMID: 32585132; PubMed Central PMCID:  
446 PMCPMC7394237.
- 447 11. Kubota Y, Kuroki R, Nishiwaki K. A fibulin-1 homolog interacts with an ADAM  
448 protease that controls cell migration in *C. elegans*. *Curr Biol*. 2004;14(22):2011-8. doi:  
449 10.1016/j.cub.2004.10.047. PubMed PMID: 15556863.
- 450 12. Kubota Y, Ohkura K, Tamai KK, Nagata K, Nishiwaki K. MIG-17/ADAMTS  
451 controls cell migration by recruiting nidogen to the basement membrane in *C. elegans*. *Proc*  
452 *Natl Acad Sci U S A*. 2008;105(52):20804-9. doi: 10.1073/pnas.0804055106. PubMed PMID:  
453 19104038; PubMed Central PMCID: PMCPMC2634947.
- 454 13. Hesselson D, Newman C, Kim KW, Kimble J. GON-1 and fibulin have  
455 antagonistic roles in control of organ shape. *Curr Biol*. 2004;14(22):2005-10. doi:

- 456 10.1016/j.cub.2004.11.006. PubMed PMID: 15556862.
- 457 14. Kubota Y, Nagata K, Sugimoto A, Nishiwaki K. Tissue architecture in the  
458 *Caenorhabditis elegans* gonad depends on interactions among fibulin-1, type IV collagen  
459 and the ADAMTS extracellular protease. *Genetics*. 2012;190(4):1379-88. doi:  
460 10.1534/genetics.111.133173. PubMed PMID: 22298704; PubMed Central PMCID:  
461 PMCPMC3316650.
- 462 15. Brenner S. The genetics of *Caenorhabditis elegans*. *Genetics*. 1974;77(1):71-94.  
463 PubMed PMID: 4366476; PubMed Central PMCID: PMCPMC1213120.
- 464 16. Gupta MC, Graham PL, Kramer JM. Characterization of  $\alpha 1$ (IV) collagen  
465 mutations in *Caenorhabditis elegans* and the effects of  $\alpha 1$  and  $\alpha 2$ (IV) mutations on  
466 type IV collagen distribution. *J Cell Biol*. 1997;137(5):1185-96. doi: 10.1083/jcb.137.5.1185.  
467 PubMed PMID: 9166417; PubMed Central PMCID: PMCPMC2136222.
- 468 17. Sibley MH, Graham PL, von Mende N, Kramer JM. Mutations in the alpha 2(IV)  
469 basement membrane collagen gene of *Caenorhabditis elegans* produce phenotypes of  
470 differing severities. *EMBO J*. 1994;13(14):3278-85. PubMed PMID: 8045258; PubMed  
471 Central PMCID: PMCPMC395224.
- 472 18. Kim HS, Kitano Y, Mori M, Takano T, Harbaugh TE, Mizutani K, et al. The novel  
473 secreted factor MIG-18 acts with MIG-17/ADAMTS to control cell migration in  
474 *Caenorhabditis elegans*. *Genetics*. 2014;196(2):471-9. doi: 10.1534/genetics.113.157685.  
475 PubMed PMID: 24318535; PubMed Central PMCID: PMCPMC3914620.
- 476 19. Wicks SR, Yeh RT, Gish WR, Waterston RH, Plasterk RH. Rapid gene mapping in  
477 *Caenorhabditis elegans* using a high density polymorphism map. *Nat Genet*.  
478 2001;28(2):160-4. doi: 10.1038/88878. PubMed PMID: 11381264.
- 479 20. Nishiwaki K. Mutations affecting symmetrical migration of distal tip cells in  
480 *Caenorhabditis elegans*. *Genetics*. 1999;152(3):985-97. PubMed PMID: 10388818; PubMed  
481 Central PMCID: PMCPMC1460665.
- 482 21. Mello CC, Kramer JM, Stinchcomb D, Ambros V. Efficient gene transfer in  
483 *C.elegans*: extrachromosomal maintenance and integration of transforming sequences.  
484 *EMBO J*. 1991;10(12):3959-70. PubMed PMID: 1935914; PubMed Central PMCID:  
485 PMCPMC453137.
- 486 22. Maduro M, Pilgrim D. Identification and cloning of unc-119, a gene expressed in  
487 the *Caenorhabditis elegans* nervous system. *Genetics*. 1995;141(3):977-88. PubMed PMID:  
488 8582641; PubMed Central PMCID: PMCPMC1206859.
- 489 23. Yochem J, Gu T, Han M. A new marker for mosaic analysis in *Caenorhabditis*  
490 *elegans* indicates a fusion between hyp6 and hyp7, two major components of the  
491 hypodermis. *Genetics*. 1998;149(3):1323-34. PubMed PMID: 9649523; PubMed Central

- 492 PMID: PMCPMC1460238.
- 493 24. Sundaramoorthy M, Meiyappan M, Todd P, Hudson BG. Crystal structure of NC1  
494 domains. Structural basis for type IV collagen assembly in basement membranes. *J Biol*  
495 *Chem.* 2002;277(34):31142-53. doi: 10.1074/jbc.M201740200. PubMed PMID: 11970952.
- 496 25. Qin J, Liang J, Ding M. Perlecan antagonizes collagen IV and ADAMTS9/GON-1  
497 in restricting the growth of presynaptic boutons. *J Neurosci.* 2014;34(31):10311-24. doi:  
498 10.1523/JNEUROSCI.5128-13.2014. PubMed PMID: 25080592; PubMed Central PMCID:  
499 PMCPMC6608278.
- 500 26. Kurshan PT, Phan AQ, Wang GJ, Crane MM, Lu H, Shen K. Regulation of  
501 synaptic extracellular matrix composition is critical for proper synapse morphology. *J*  
502 *Neurosci.* 2014;34(38):12678-89. doi: 10.1523/JNEUROSCI.1183-14.2014. PubMed PMID:  
503 25232106; PubMed Central PMCID: PMCPMC4166155.
- 504 27. Yoshina S, Sakaki K, Yonezumi-Hayashi A, Gengyo-Ando K, Inoue H, Iino Y, et al.  
505 Identification of a novel ADAMTS9/GON-1 function for protein transport from the ER to  
506 the Golgi. *Mol Biol Cell.* 2012;23(9):1728-41. doi: 10.1091/mbc.E11-10-0857. PubMed PMID:  
507 22419820; PubMed Central PMCID: PMCPMC3338439.
- 508 28. Yamada KM, Collins JW, Cruz Walma DA, Doyle AD, Morales SG, Lu J, et al.  
509 Extracellular matrix dynamics in cell migration, invasion and tissue morphogenesis. *Int J*  
510 *Exp Pathol.* 2019;100(3):144-52. doi: 10.1111/iep.12329. PubMed PMID: 31179622; PubMed  
511 Central PMCID: PMCPMC6658910.
- 512 29. Morrissey MA, Sherwood DR. An active role for basement membrane assembly  
513 and modification in tissue sculpting. *J Cell Sci.* 2015;128(9):1661-8. doi: 10.1242/jcs.168021.  
514 PubMed PMID: 25717004; PubMed Central PMCID: PMCPMC4446735.

515

## 516 **Supporting information**

### 517 **S1 Fig. Schematic presentation of gonad formation in the *C. elegans***

518 **hermaphrodite.** The hermaphrodite U-shaped gonad arms are generated by migration  
519 of two DTCs. DTCs are generated at the anterior (A) and posterior (P) ends of the  
520 gonad primordium at the first larval stage (L1) and migrate along the anteroposterior  
521 axis on the ventral (V) body wall muscle (L2–L3). The DTCs turn dorsally (D) and

522 migrate along the lateral hypodermis (L3). Finally, the DTCs undergo a second turn and  
523 migrate along the dorsal body wall muscle to form the symmetrical U-shaped arms  
524 (L4).

525

526 **S2 Fig. Structure and mutation sites of GON-1 and MIG-17 proteins.** Domain

527 organization is shown by colored boxes. Mutation sites for *gon-1(q518* and *e1254)* and  
528 *mig-17(k174)* are indicated.

529

530 **S3 Fig. Isolation of *gon-1* suppressors.** Gonad arms (arrows) of young adult

531 hermaphrodites are shown. **A., B.** Nomarski images of wild type (A) and *gon-1(e1254)*  
532 (B). **C., D.** Nomarski (C) and fluorescence (D) images of a *gon-1(e1254); tkEx370[gon-*  
533 *1 fosmid, rol-6(su1006), sur-5::GFP]* young adult hermaphrodite. **E., F.** Nomarski (E)  
534 and fluorescence (F) images of a *let-2(k101); gon-1(e1254)* young adult hermaphrodite,  
535 which lost the *tkEx370[gon-1 fosmid, rol-6(su1006), sur-5::GFP]* extrachromosomal  
536 array.

537

538 **S4 Fig. Percentage of fertile animals.** For each strain, 20 first larval stage

539 hermaphrodites were grown at 20°C, and the number of animals that produced offspring

540 were counted. Green and red bars represent % fertile and % sterile animals, respectively.

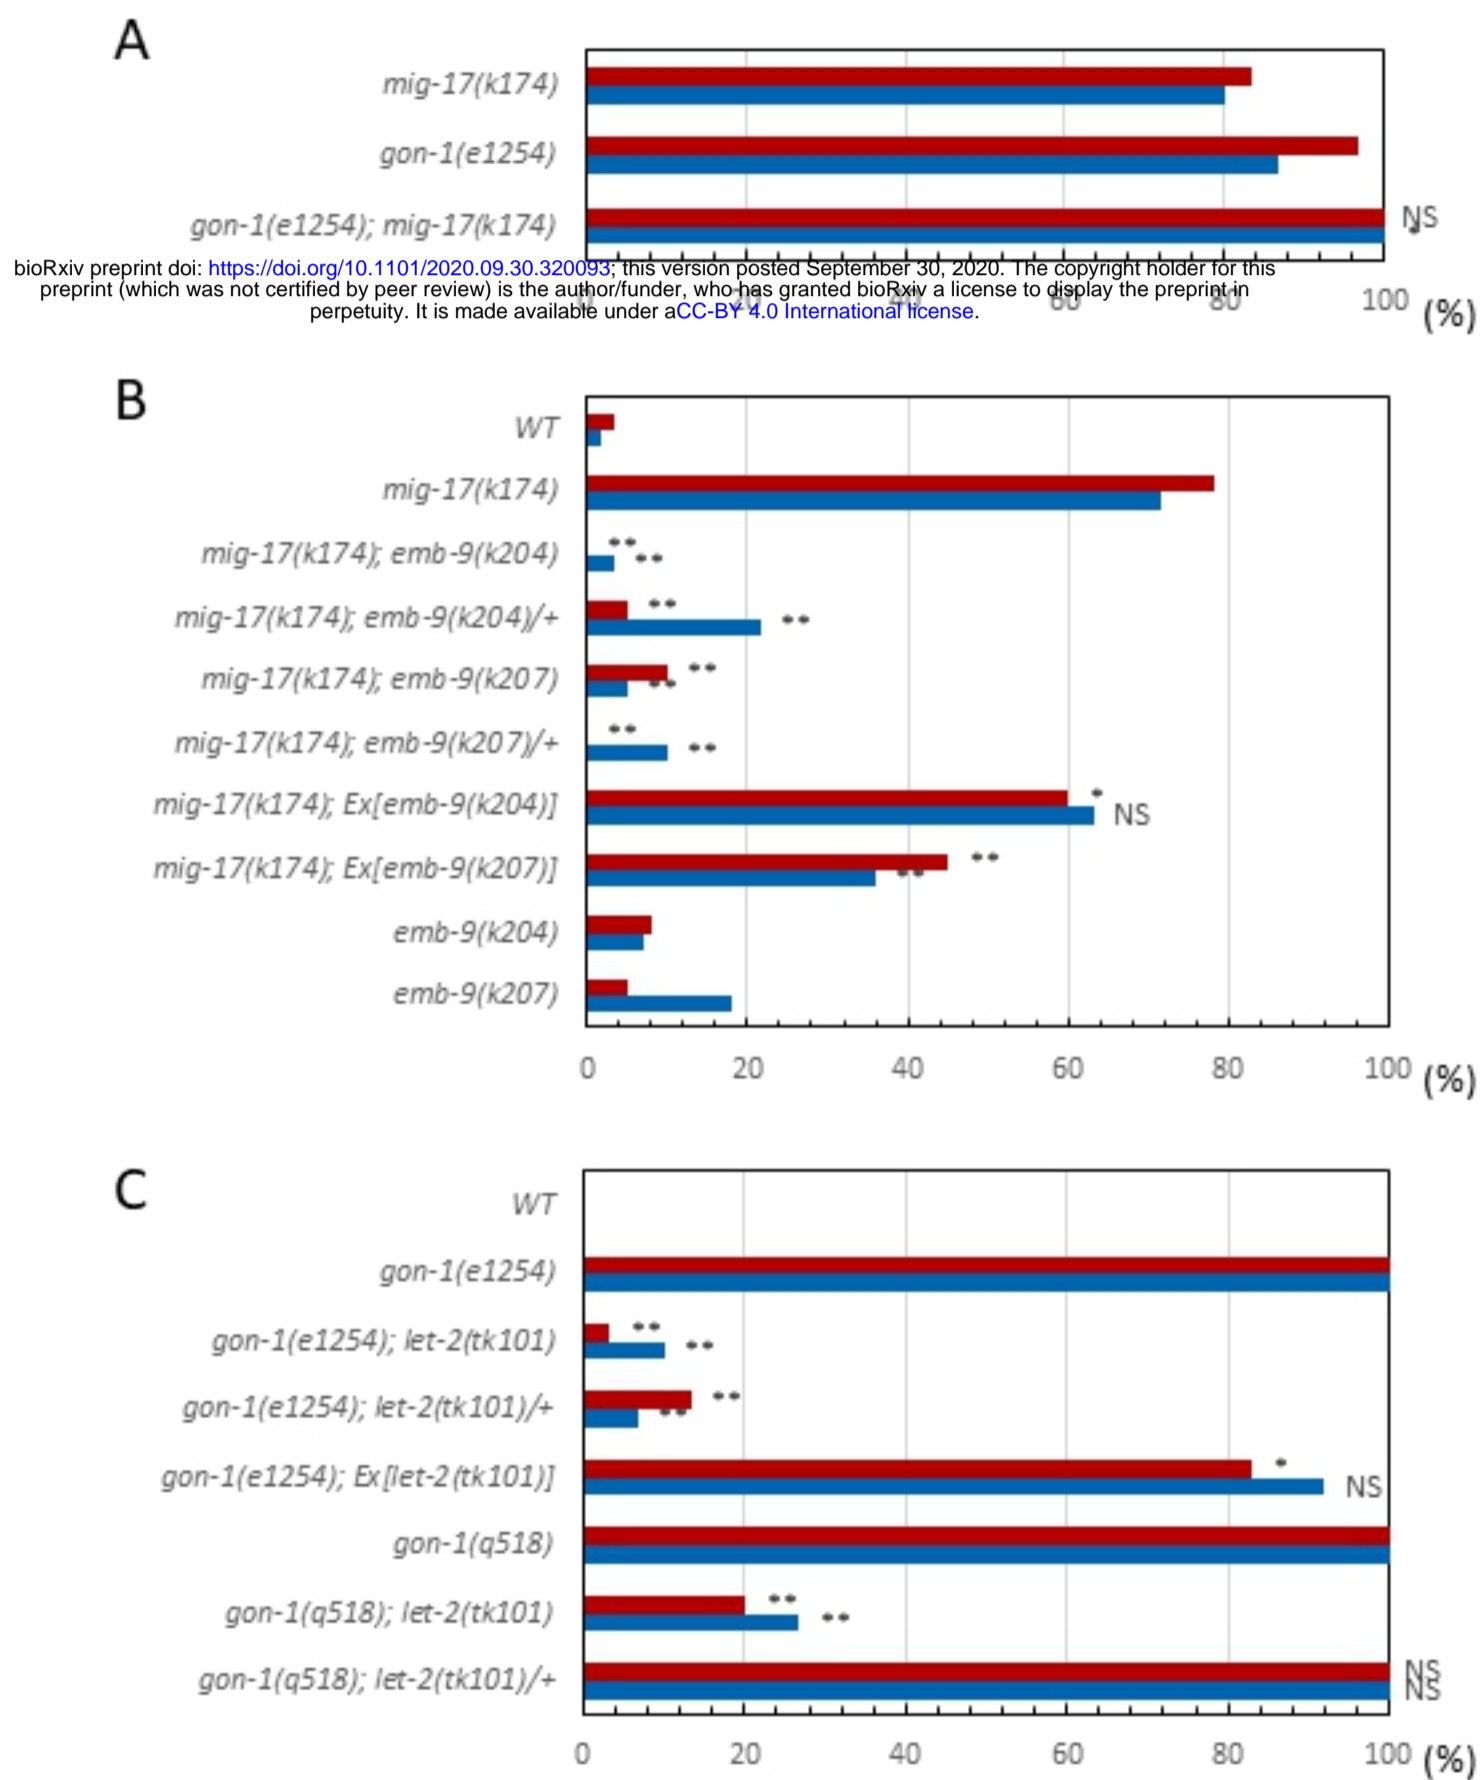

bioRxiv preprint doi: <https://doi.org/10.1101/2020.09.30.320093>; this version posted September 30, 2020. The copyright holder for this preprint (which was not certified by peer review) is the author/funder, who has granted bioRxiv a license to display the preprint in perpetuity. It is made available under aCC-BY 4.0 International license.

Fig 1

A

|              | <i>gon-1</i> suppressor or enhancer   | <i>mig-17</i> suppressor        |
|--------------|---------------------------------------|---------------------------------|
| <i>fbl-1</i> | <i>tk45</i>                           | <i>k201</i>                     |
| <i>emb-9</i> | <i>tk75, g34, g23cg46</i> (enhancers) | <i>g34, g23cg46, k204, k207</i> |
| <i>let-2</i> | <i>tk101</i>                          | <i>g25, b246, k193, k196</i>    |

B

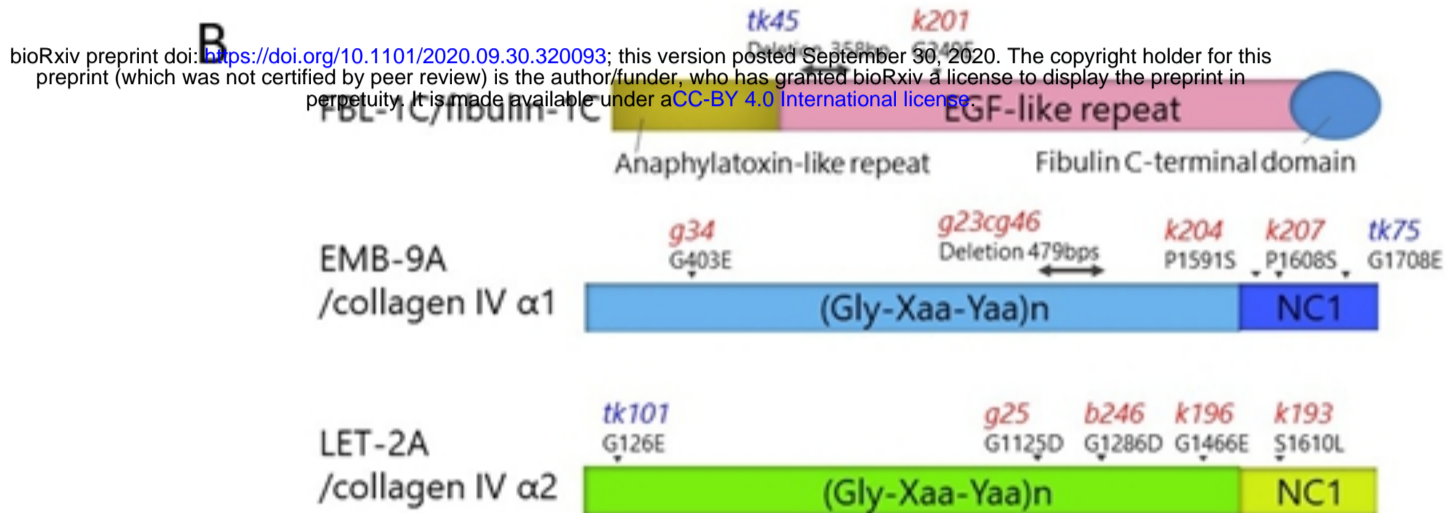

C

|              | Allele           | <i>mig-17</i> | <i>gon-1</i> |
|--------------|------------------|---------------|--------------|
| <i>fbl-1</i> | <i>tk45</i>      | E             | S            |
|              | <i>k201</i>      | S             | S            |
| <i>emb-9</i> | <i>g34</i>       | S             | E            |
|              | <i>g23cg46/+</i> | S             | E            |
|              | <i>k204</i>      | S             | S            |
|              | <i>k207</i>      | S             | S            |
|              | <i>tk75</i>      | E             | E            |
| <i>let-2</i> | <i>g25</i>       | S             | E            |
|              | <i>b246</i>      | S             | E            |
|              | <i>tk101</i>     | S             | S            |
|              | <i>k196</i>      | S             | S            |
|              | <i>k193</i>      | S             | S            |

Fig 2

bioRxiv preprint doi: <https://doi.org/10.1101/2020.09.30.320093>; this version posted September 30, 2020. The copyright holder for this preprint (which was not certified by peer review) is the author/funder, who has granted bioRxiv a license to display the preprint in perpetuity. It is made available under aCC-BY 4.0 International license.

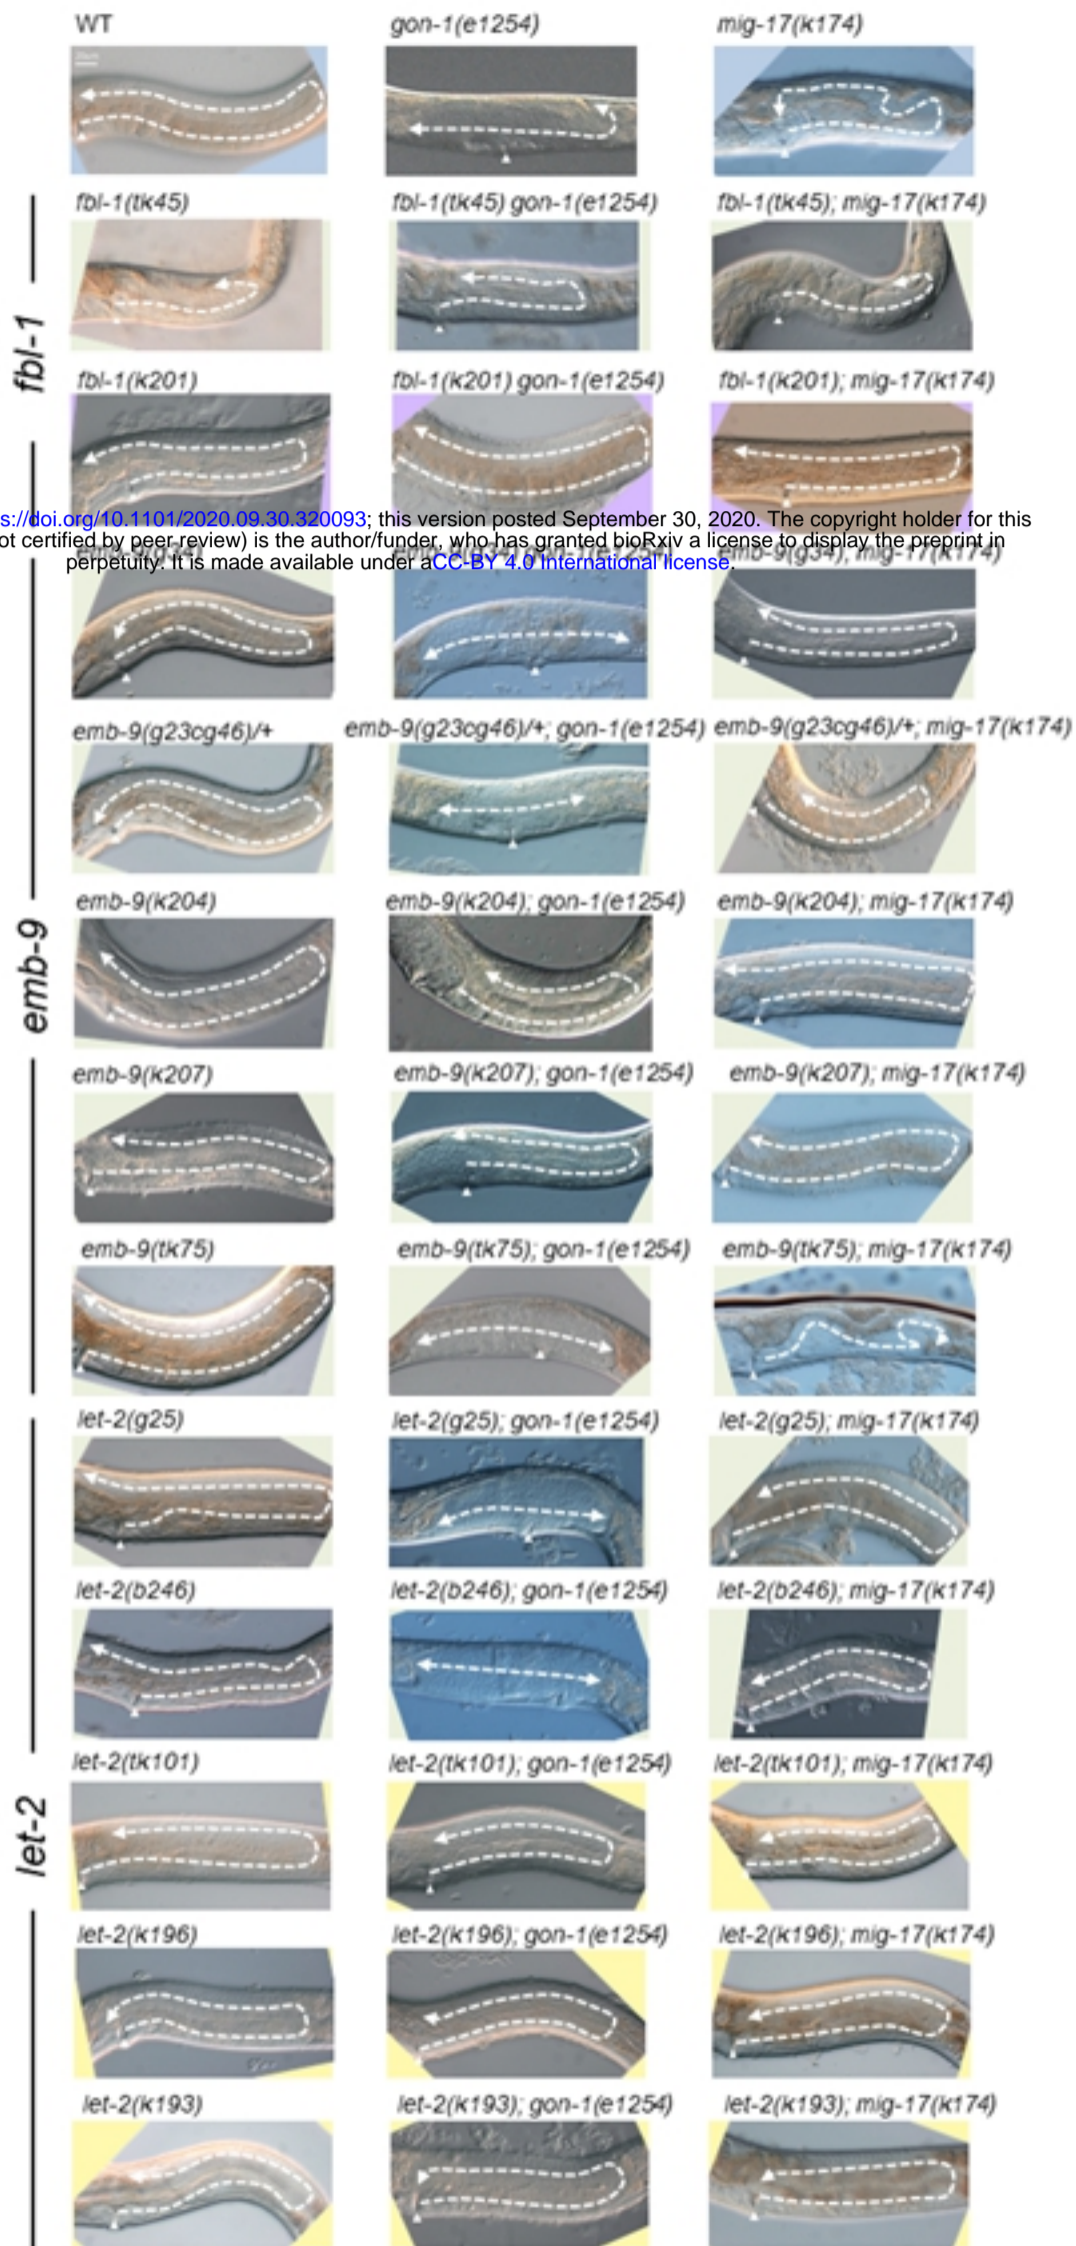

Fig 3



bioRxiv preprint doi: <https://doi.org/10.1101/2020.09.30.320093>; this version posted September 30, 2020. The copyright holder for this preprint (which was not certified by peer review) is the author/funder, who has granted bioRxiv a license to display the preprint in perpetuity. It is made available under aCC-BY 4.0 International license.

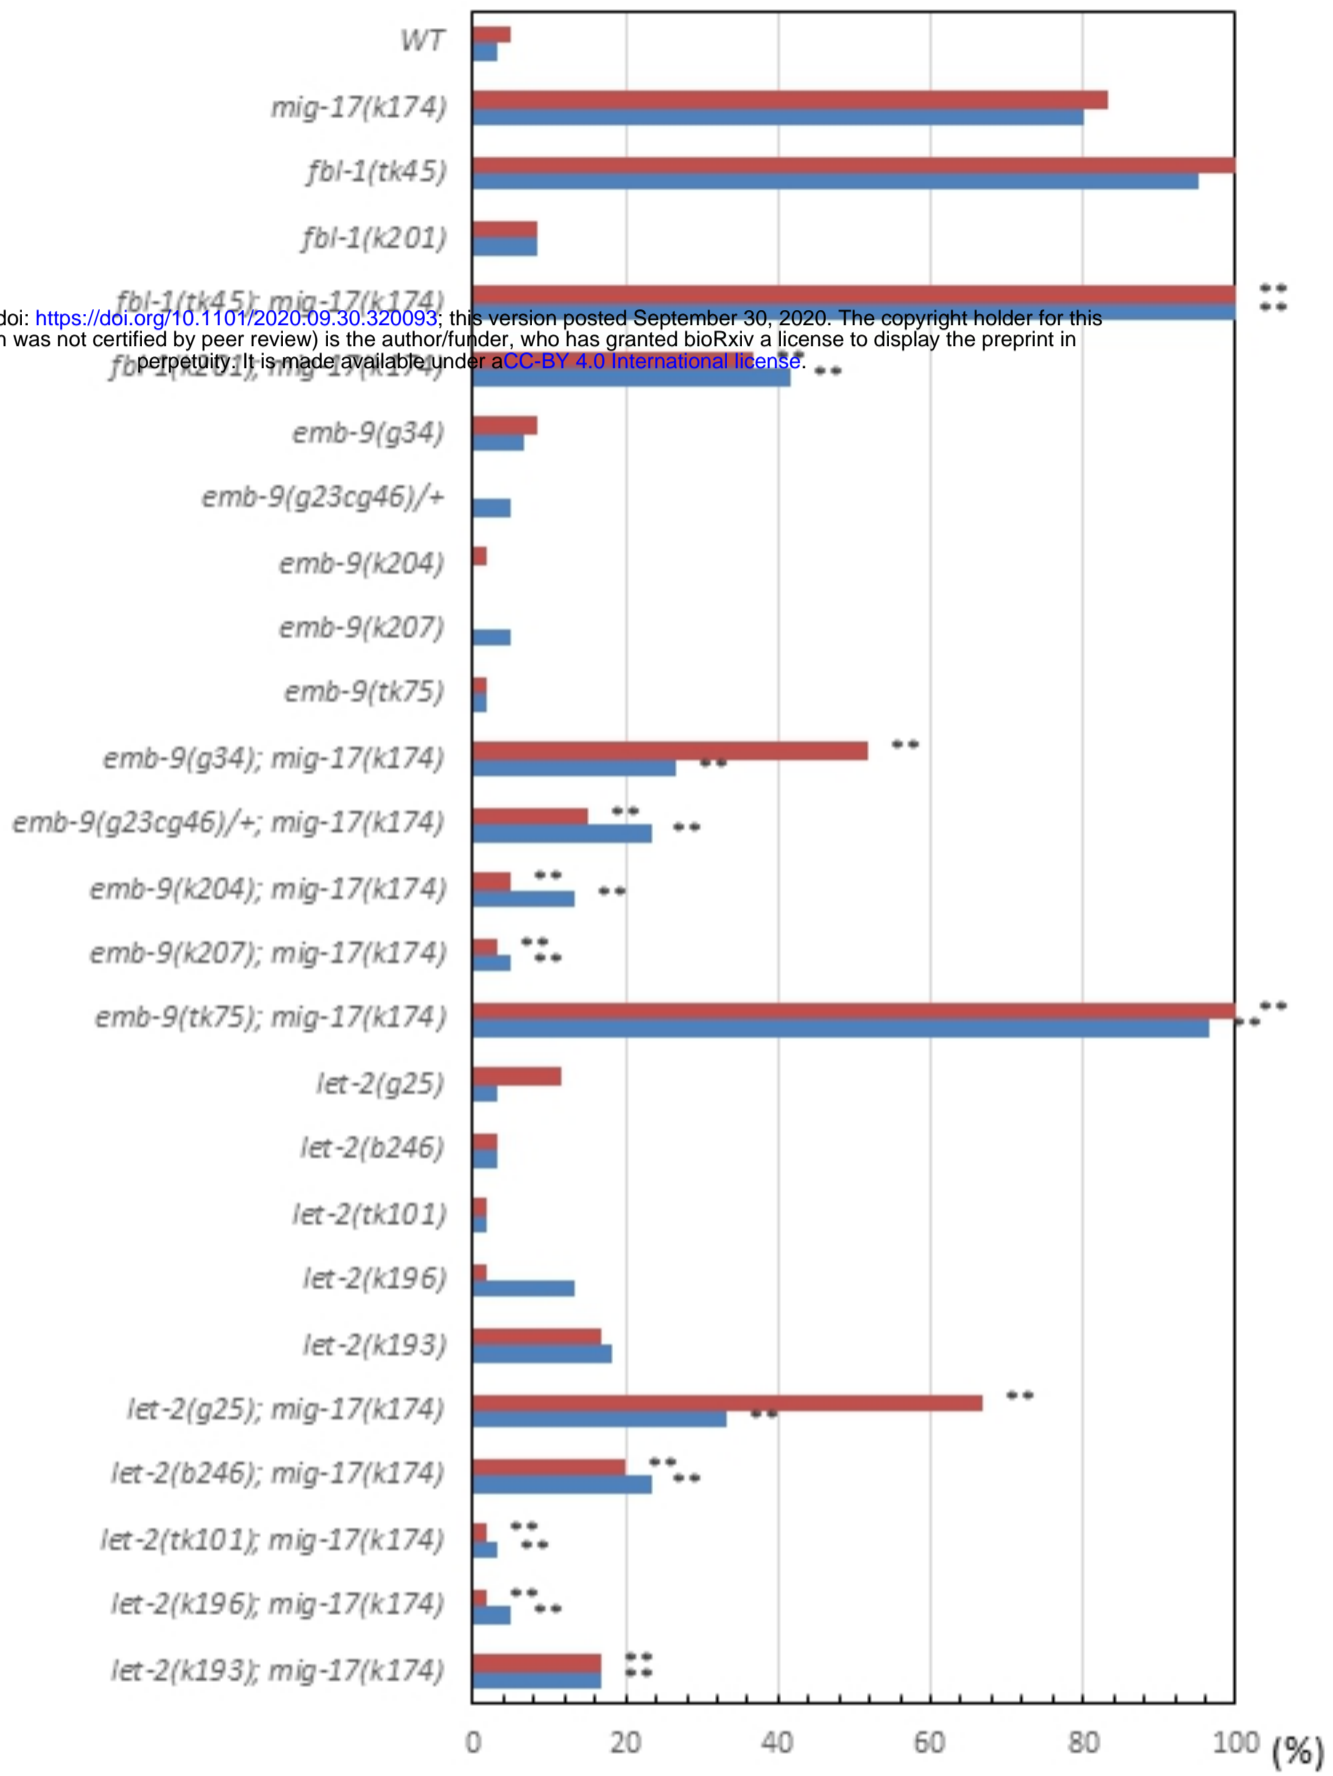

Fig 4

bioRxiv preprint doi: <https://doi.org/10.1101/2020.09.30.320093>; this version posted September 30, 2020. The copyright holder for this preprint (which was not certified by peer review) is the author/funder, who has granted bioRxiv a license to display the preprint in perpetuity. It is made available under aCC-BY 4.0 International license.

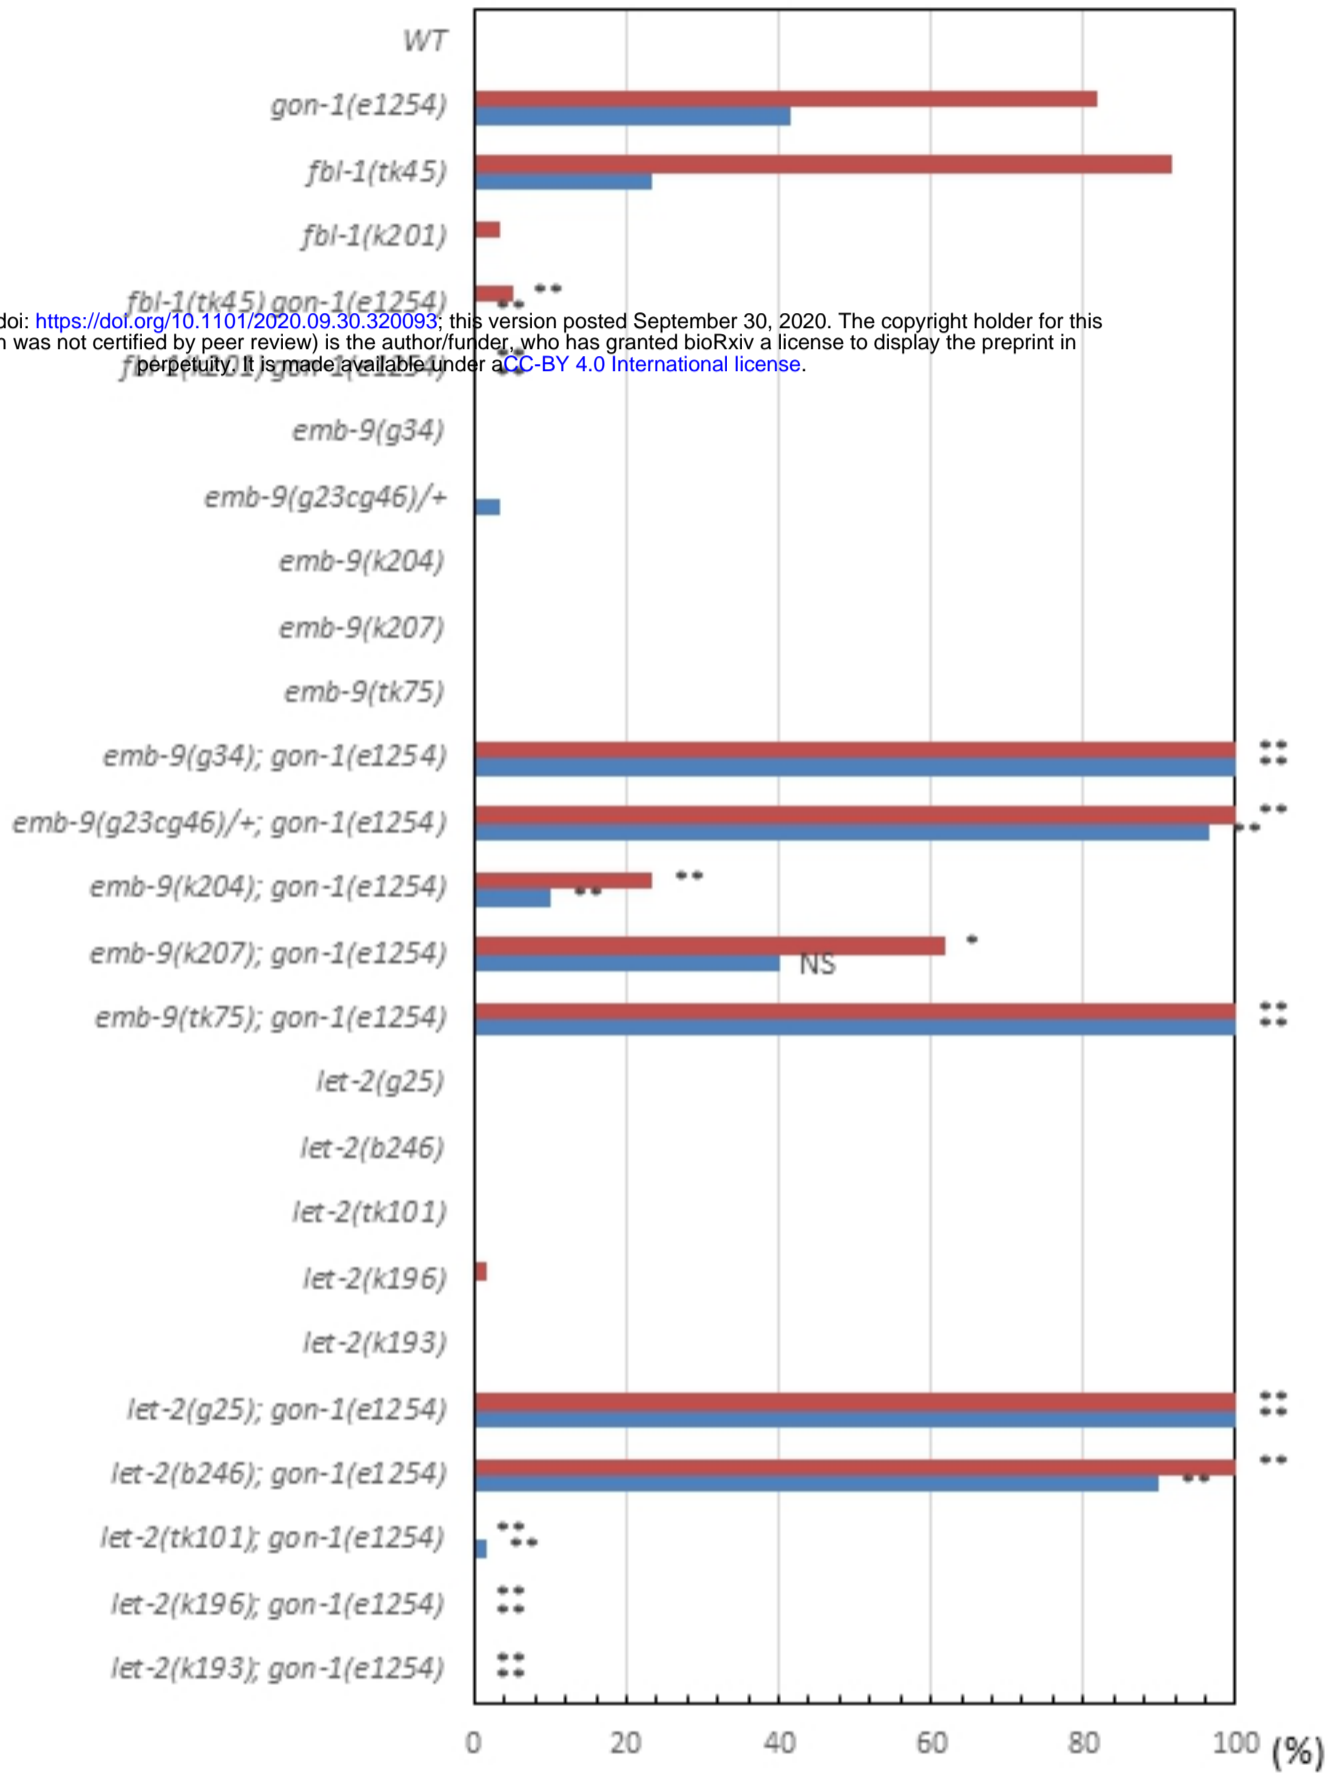

Fig 5

EMB-9/collagen IV  $\alpha$ 1

LET-2/collagen IV  $\alpha$ 2

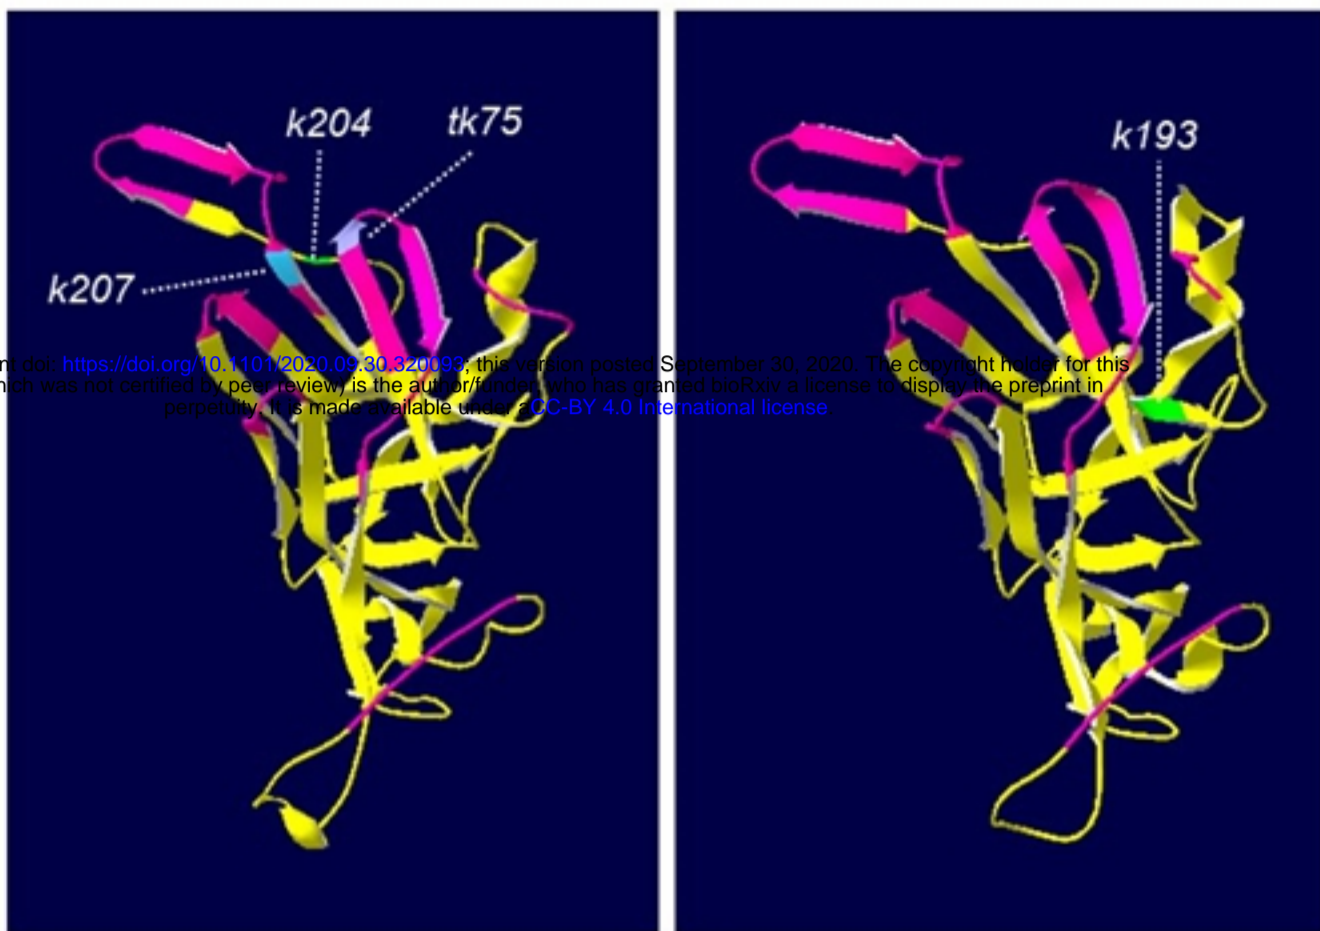

Fig 6

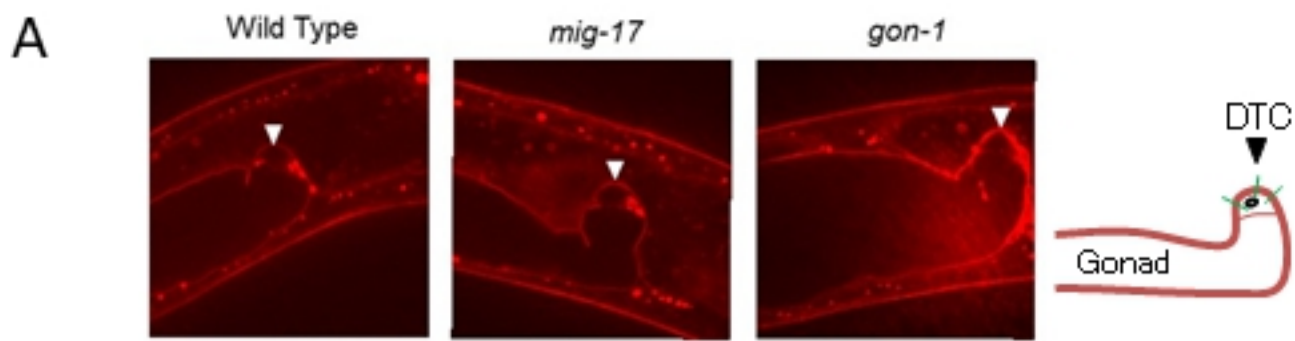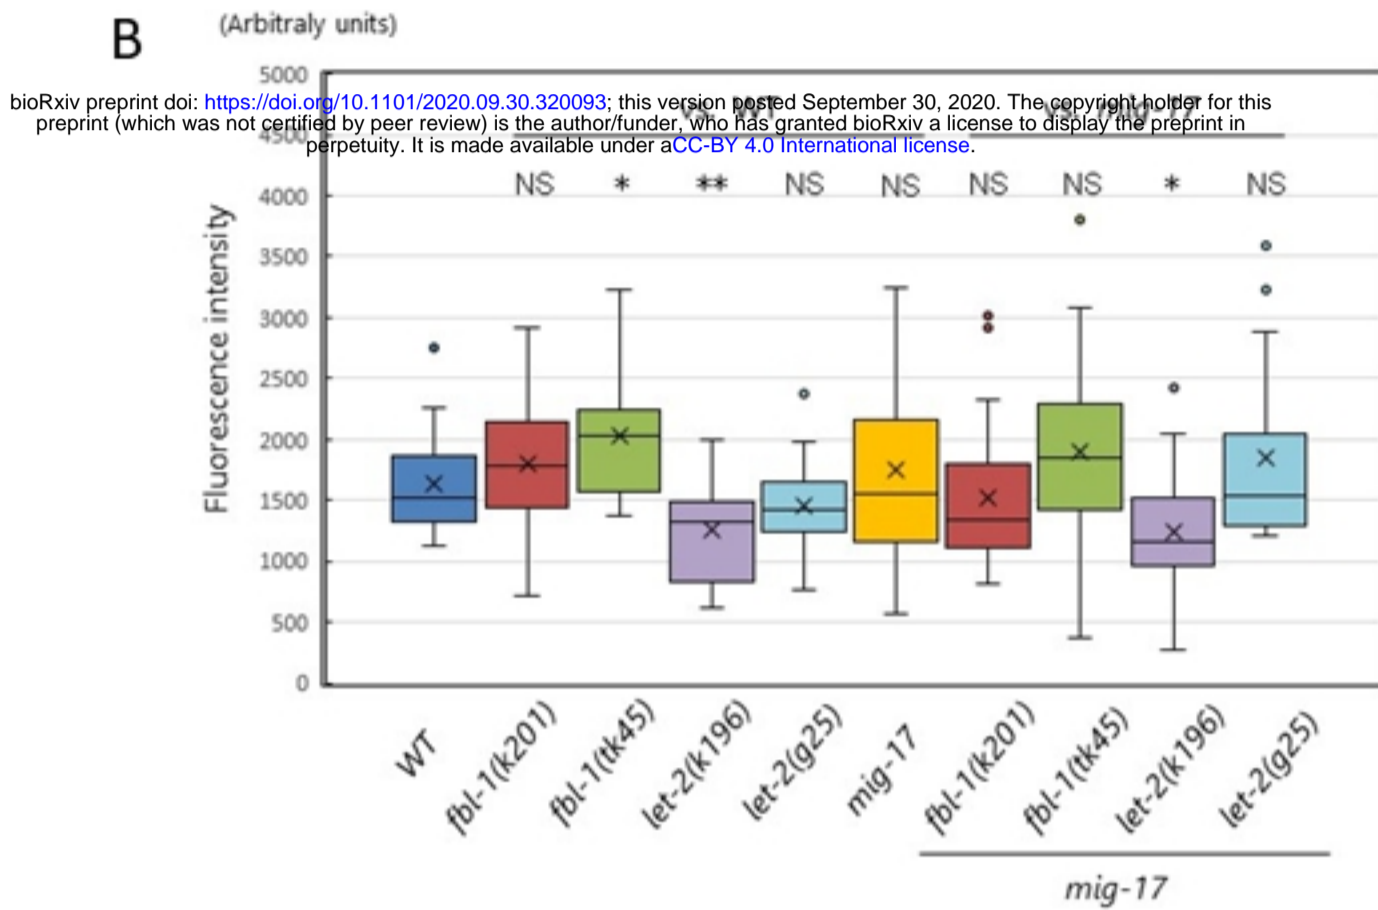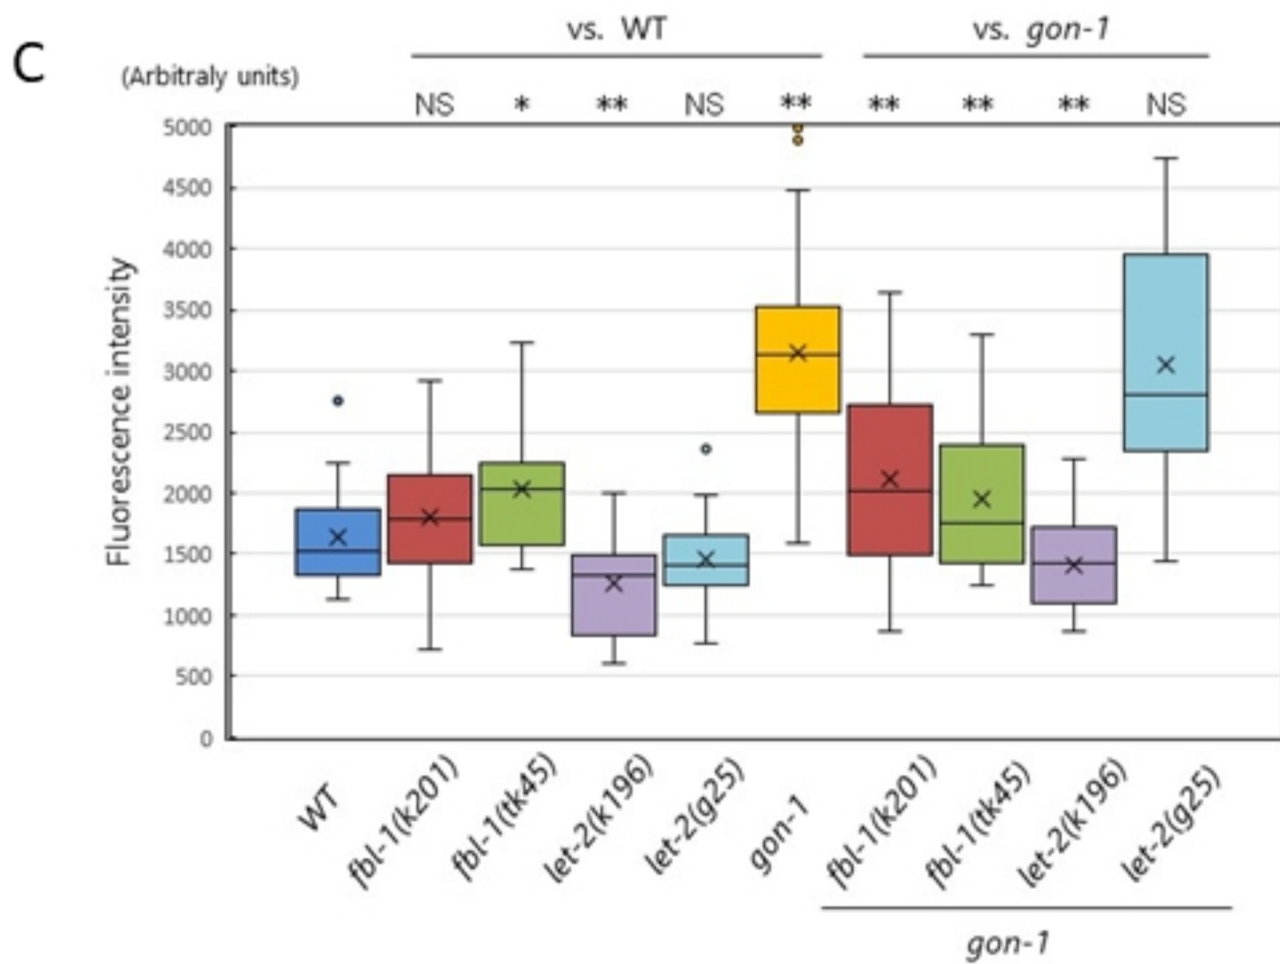

**Fig 7**
